# Supplementary material for: A hybrid supercapacitor based on flower-like Co(OH)2 and urchin-like VN electrode materials
Source: Royal Society of Chemistry journal article supplement (doi:10.1039/c4ta01296h), 2014-01-01
Supplement: c4ta01296h1.pdf [file c4ta01296h1.pdf]

Supporting information for *Journal of Materials Chemistry A*

**Hybrid supercapacitor based on the flower-like Co(OH)<sub>2</sub>  
and urchin-like VN electrode materials**

Rutao Wang,<sup>†‡§</sup> Xingbin Yan,<sup>\*†‡</sup> Junwei Lang,<sup>†‡</sup> Zongmin Zheng<sup>†‡</sup> & Peng  
Zhang<sup>†‡§</sup>

*†Laboratory of Clean Energy Chemistry and Materials, Lanzhou Institute of  
Chemical Physics, Chinese Academy of Science, Lanzhou 730000, P. R.  
China*

*‡State Key Laboratory of Solid Lubrication, Lanzhou Institute of Chemical  
Physics, Chinese of Academy of Sciences, Lanzhou, 730000, China*

*§Graduate University of Chinese Academy of Sciences, Chinese of Academy  
of Sciences, Beijing, 100080, China*

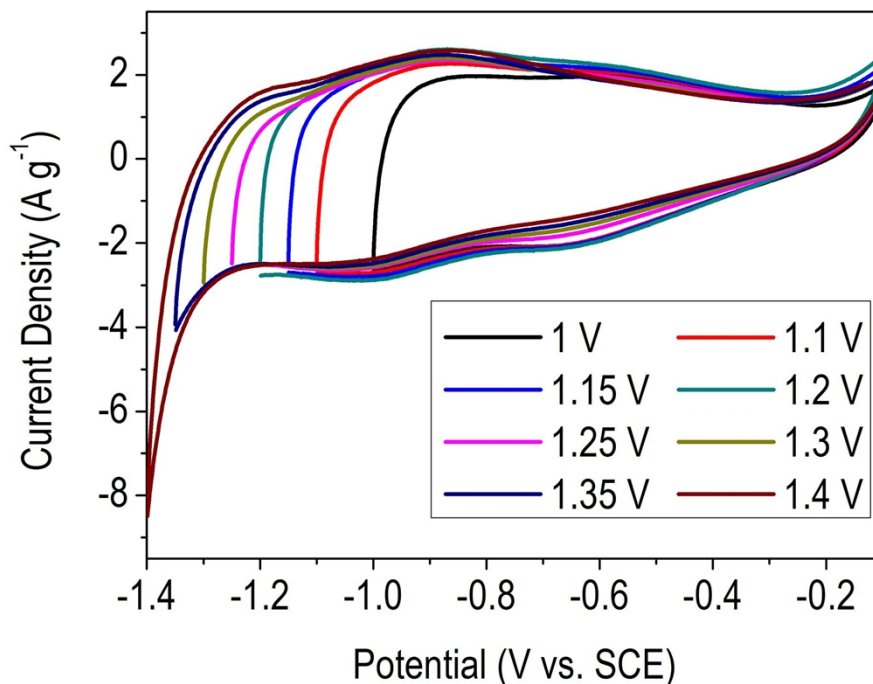

**Figure S1** CV curves of VN at the scan rate of  $20 \text{ mV s}^{-1}$  under the different working potential range. Obviously, the cycling potential is lower than  $1.2 \text{ V}$ , the polarization current is observed, indicating the wide work potential range of urchin-like VN.

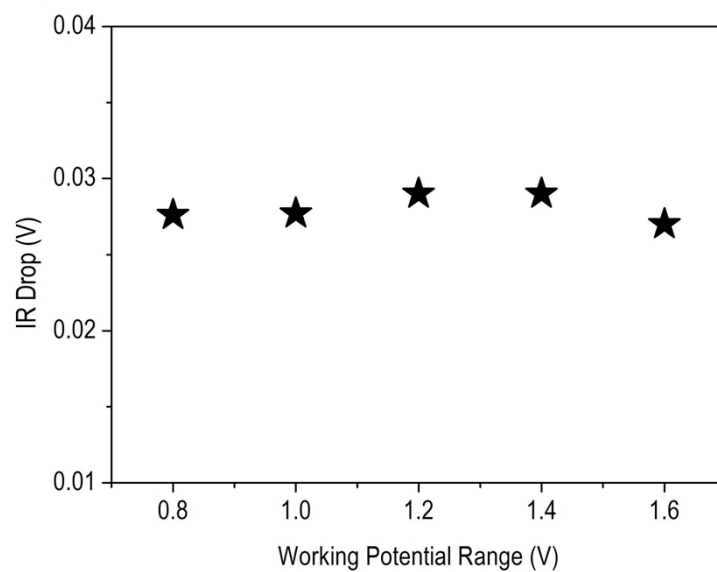

**Figure S2** Voltage drop (IR drop) of hybrid supercapacitor from the charging/discharging curves at the current density of  $1 \text{ A g}^{-1}$ .

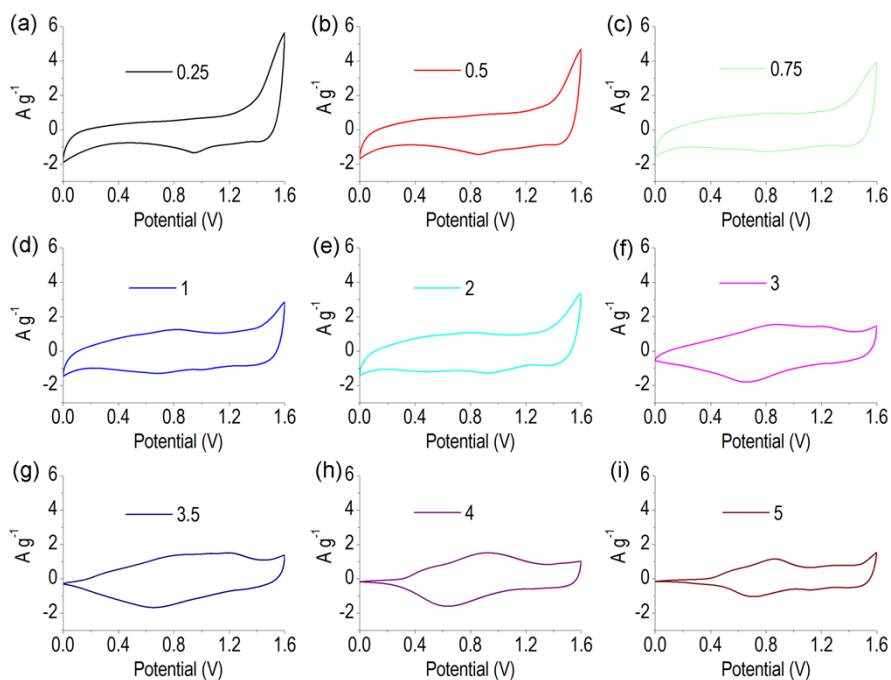

**Figure S3** CV curves of hybrid supercapacitors at the scan rate of  $20 \text{ mV s}^{-1}$  under the different VN/Co(OH)<sub>2</sub> mass ratios.

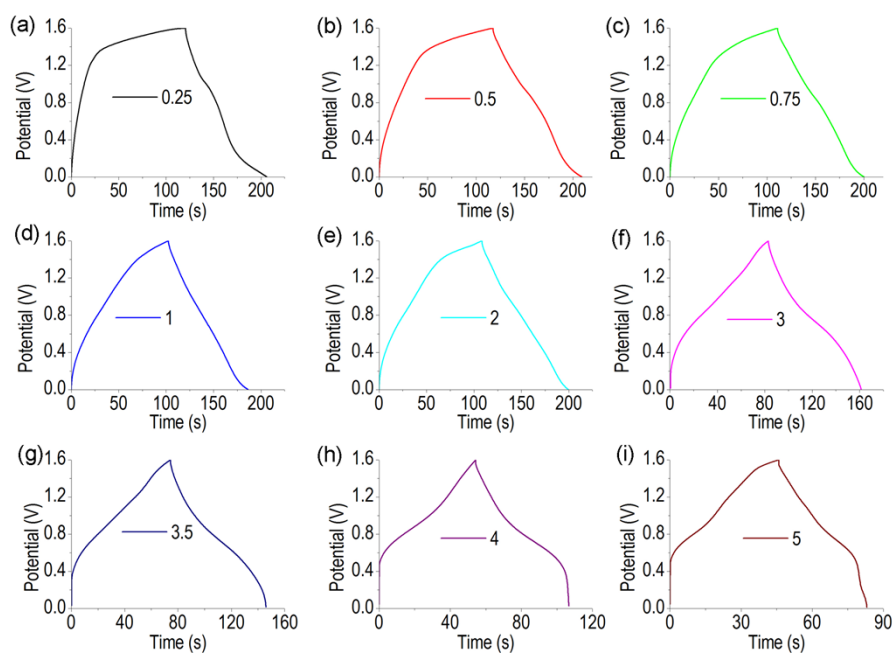

**Figure S4** Galvanostatic charge/discharge curves of hybrid supercapacitors at the current density of  $1 \text{ A g}^{-1}$  under the different VN/Co(OH)<sub>2</sub> mass ratios.

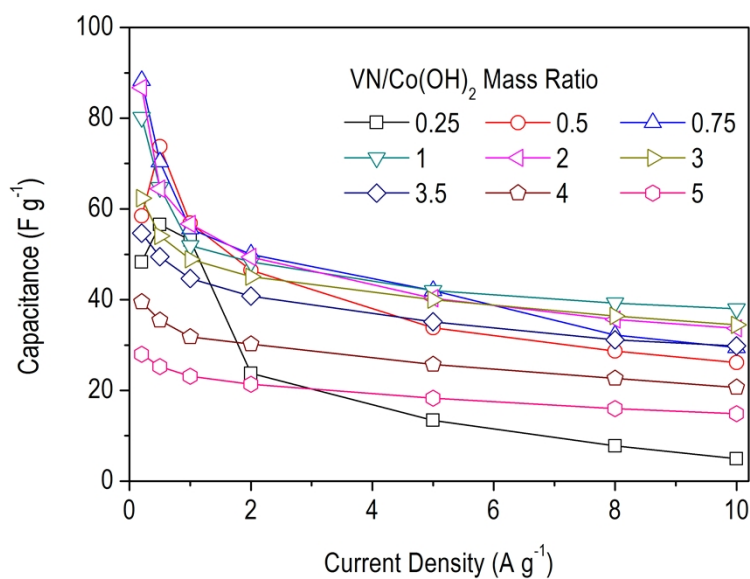

**Figure S5** Comparison of specific capacitance of hybrid supercapacitor fabricated by different VN/Co(OH)<sub>2</sub> mass ratios at the different current densities.

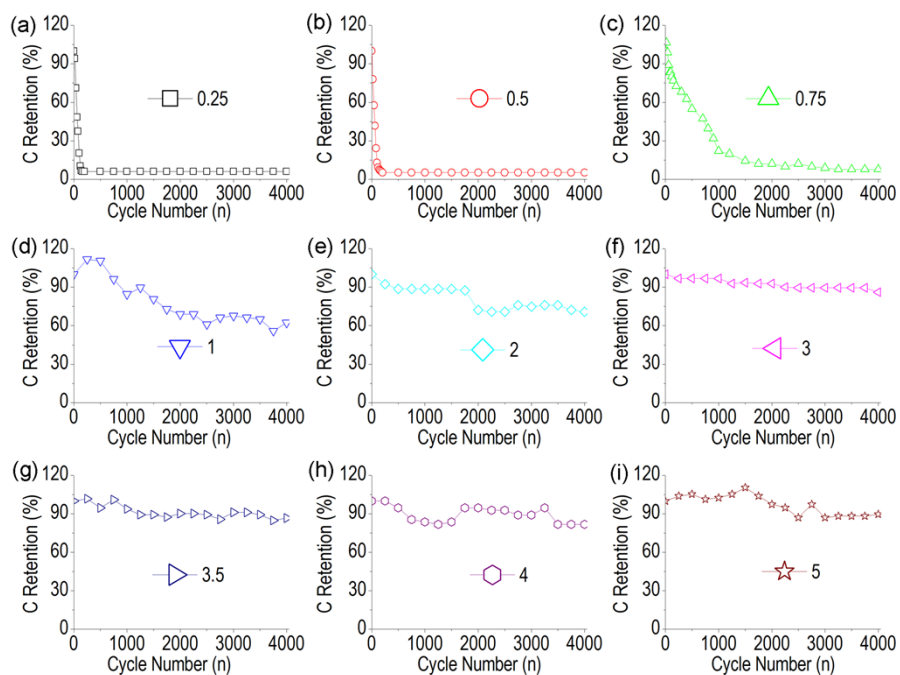

**Figure S6** Cycle-life performance of hybrid supercapacitor fabricated by different VN/Co(OH)<sub>2</sub> mass ratios with a voltage of 1.6 V at the current densities of 1 A g<sup>-1</sup> in 2 M KOH electrolyte.

It is important to understand the relation between the cell capacitances and positive/negative mass ratios. Here, we used the Wilson' mathematical model (*reference 39*) to predict cell parameters for a theoretical hybrid Co(OH)<sub>2</sub>/VN systems and to correlate experimentally obtained parameters as well as to find the optimal positive/negative mass ratio. Wilson' mathematical model is very simple and effective way in where the potential of both electrodes swings during cycling. In our hybrid system, the potential of Co(OH)<sub>2</sub> and VN electrode swing during cycling, as shown in Figure 3b and Figure 6c. Thus, Wilson' mathematical model is effective in our hybrid system.

To a hybrid supercapacitor, this class of cell assembly can simplistically be treated as two (dissimilar capacitor) in series. Assuming two capacitors in series, the total capacitance,  $C_c$  (F), is given by

$$\frac{1}{C_c} = \frac{1}{C_p} + \frac{1}{C_n} \quad (1)$$

where the capacitance of the positive (Co(OH)<sub>2</sub>) electrode is  $C_p$  (F) and that of the negative (VN) electrode is  $C_n$  (F).

$$C_c = c_c \times m_c \quad (2)$$

$$C_p = c_p \times m_p \quad (3)$$

$$C_n = c_n \times m_n \quad (4)$$

Where,  $c_p$ ,  $c_n$ , and  $c_c$  is the specific capacitance of positive electrode material, negative electrode material, and hybrid supercapacitor, respectively, and  $m_p$ ,  $m_n$ , and  $m_c$  is the total mass of active electrode in the positive electrode, negative electrode, and hybrid supercapacitor, respectively. Obviously

$$m_c = m_p + m_n \quad (5)$$

According to equation (1), (2), (3), and (4), we can obtain

$$\frac{1}{c_c \times m_c} = \frac{1}{c_p \times m_p} + \frac{1}{c_n \times m_n} \quad (6)$$

Performing this substitution and subsequent rearrangement allows us to obtain expressions that include the mass ratio,  $\gamma$ , where

$$\gamma = \frac{m_n}{m_p} \quad (7)$$

Here, (5) and (7) substitute into Eq. (6), where  $c_c$  expresses as

$$c_c = \frac{c_p c_n / (c_p + c_n / \gamma)}{1 + (1/r)} \quad (8)$$

Differentiating Eq. (8) with respect to mass ratio,  $\gamma$ , and equating to zero yields the electrode mass ratio that achieves the maximum value of  $c_c$ :

$$\gamma_{\max} = \sqrt{\frac{c_p}{c_n}} \quad (9)$$

Simulation results in Figure S5 and Figure 7 can be obtained from Eq. (8). As  $c_p$  and  $c_n$  value is  $405 \text{ F g}^{-1}$ ,  $89 \text{ F g}^{-1}$  under the current density of  $2 \text{ A g}^{-1}$ ,  $\gamma_{\max}$  value in our hybrid supercapacitor is about 2.1, according to Eq.(9). As the optimal VN/Co(OH)<sub>2</sub> mass ratio is about 2.1, the maximum specific capacitance of hybrid capacitance can be obtained.

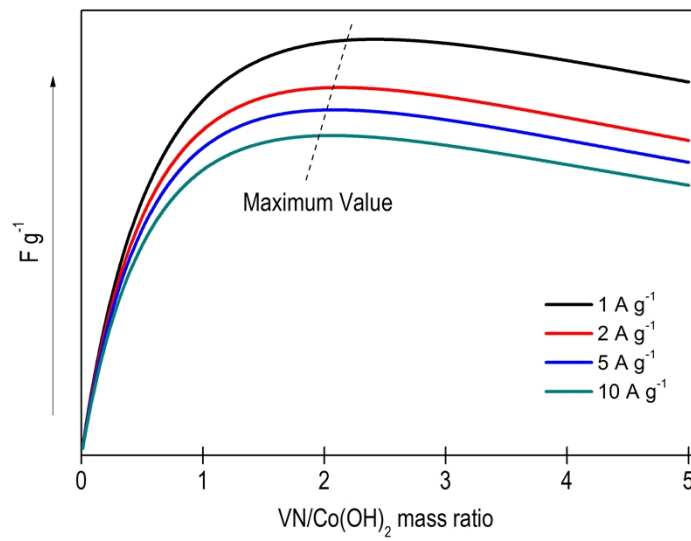

**Figure S7** Plots depicts specific capacitance to VN/Co(OH)<sub>2</sub> mass ratio of hybrid supercapacitor simulated from Wilson' mathematical model under the different current densities.

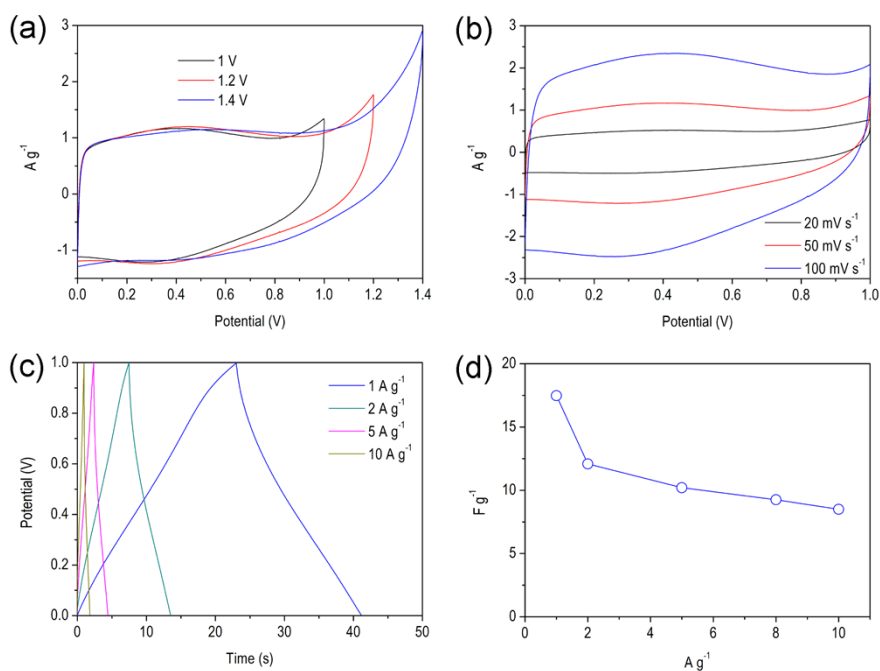

**Figure S8** Electrochemical properties of VN//VN supercapacitor: (a) CV curves measured at different potential windows in 2 M KOH electrolyte at the scan rate of 50 mV s<sup>-1</sup>. It is noted that the positive polarization occurring at the high potential window (>1 V), so the optimal operating working potential is 1 V. (b) CV curves at the different scan rates. (c) Galvanostatic charge/discharge curves at the different current densities. (d) Specific capacitance calculated from the different current densities.

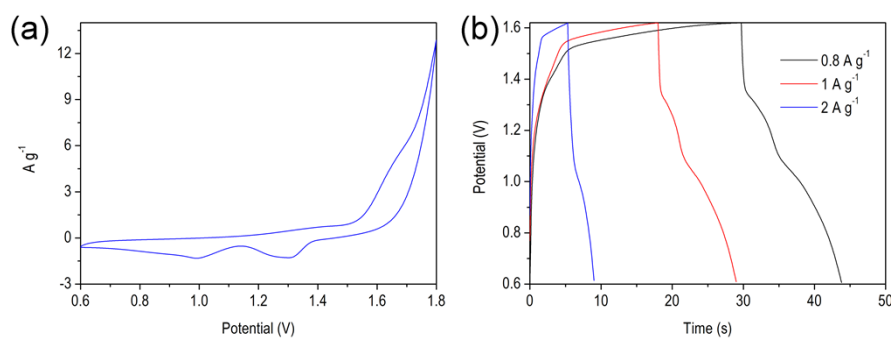

**Figure S9** Electrochemical properties of Co(OH)<sub>2</sub>//Co(OH)<sub>2</sub> supercapacitor: (a) CV curves of at the scan rate of 50 mV s<sup>-1</sup>. (b) Galvanostatic charge/discharge curves at the different current densities.

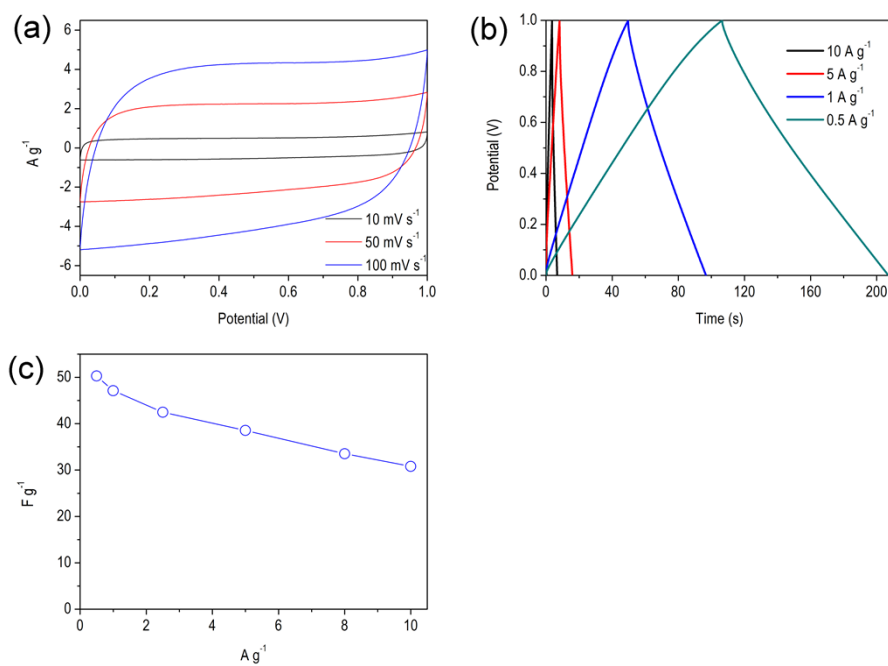

**Figure S10** Electrochemical properties of AC//AC supercapacitor: (a) CV curves at the different scan rates. (b) Galvanostatic charge/discharge curves at the different current densities. (c) Specific capacitance calculated from the different current densities. AC was purchased from *Shihezi Tianfu Tech Co., Ltd, China* (TF-01, BET SSA:  $2100 \text{ m}^2 \text{ g}^{-1}$ ).
